# Supplementary material for: Increased Renal Medullary NOX-4 in Female but Not Male Mice during the Early Phase of Type 1 Diabetes: Potential Role of ROS in Upregulation of TGF-β1 and Fibronectin in Collecting Duct Cells
Source: MDPI journal article supplement (doi:10.3390/antiox12030729), 2023-03-16
Supplement: s1 [file s1]

# SUPPLEMENTARY MATERIALS

## **Increased Renal Medullary NOX-4 in Female but Not Male Mice during the Early Phase of Type 1 Diabetes: Potential Role of ROS in Upregulation of TGF- $\beta$ 1 and Fibronectin in Collecting Duct Cells**

Felipe Casado-Barragán <sup>1, +</sup>, Geraldine Lazcano-Páez <sup>1,†</sup>, Paulina E. Larenas <sup>1</sup>, Monserrat Aguirre-Delgadillo <sup>1</sup>,  
Fernanda Olivares-Aravena <sup>1</sup>, Daniela Witto-Oyarce <sup>1</sup>, Camila Núñez-Allimant <sup>1</sup>, Katherin Silva <sup>1</sup>,  
Quynh My Nguyen <sup>2</sup>, Pilar Cárdenas <sup>1</sup>, Modar Kassan <sup>3</sup> and Alexis A. Gonzalez <sup>1,\*</sup>

**Figure S1. Blots used to quantify protein levels**

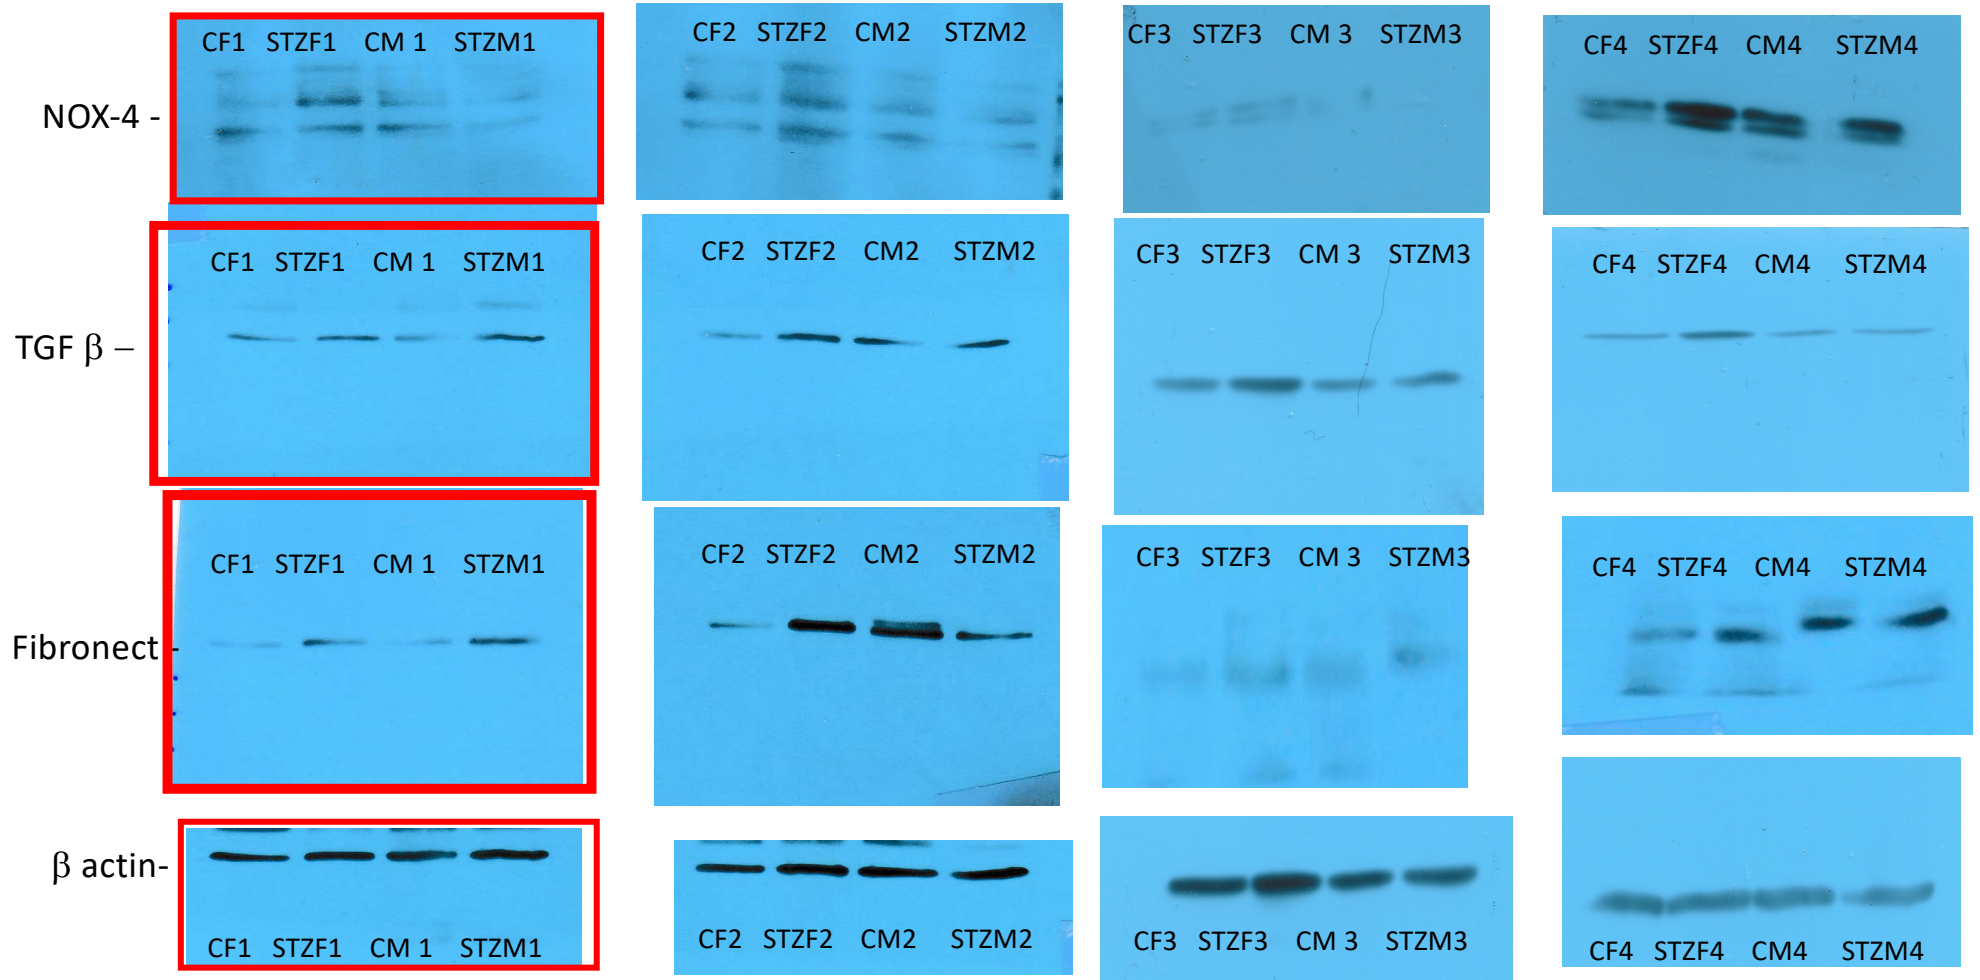

Replicates analyzed by immunoblots. CF= control females; STZF= females STZ; CM=control Males; STZM= males STZ

Figure S2. Gel identity and molecular weight

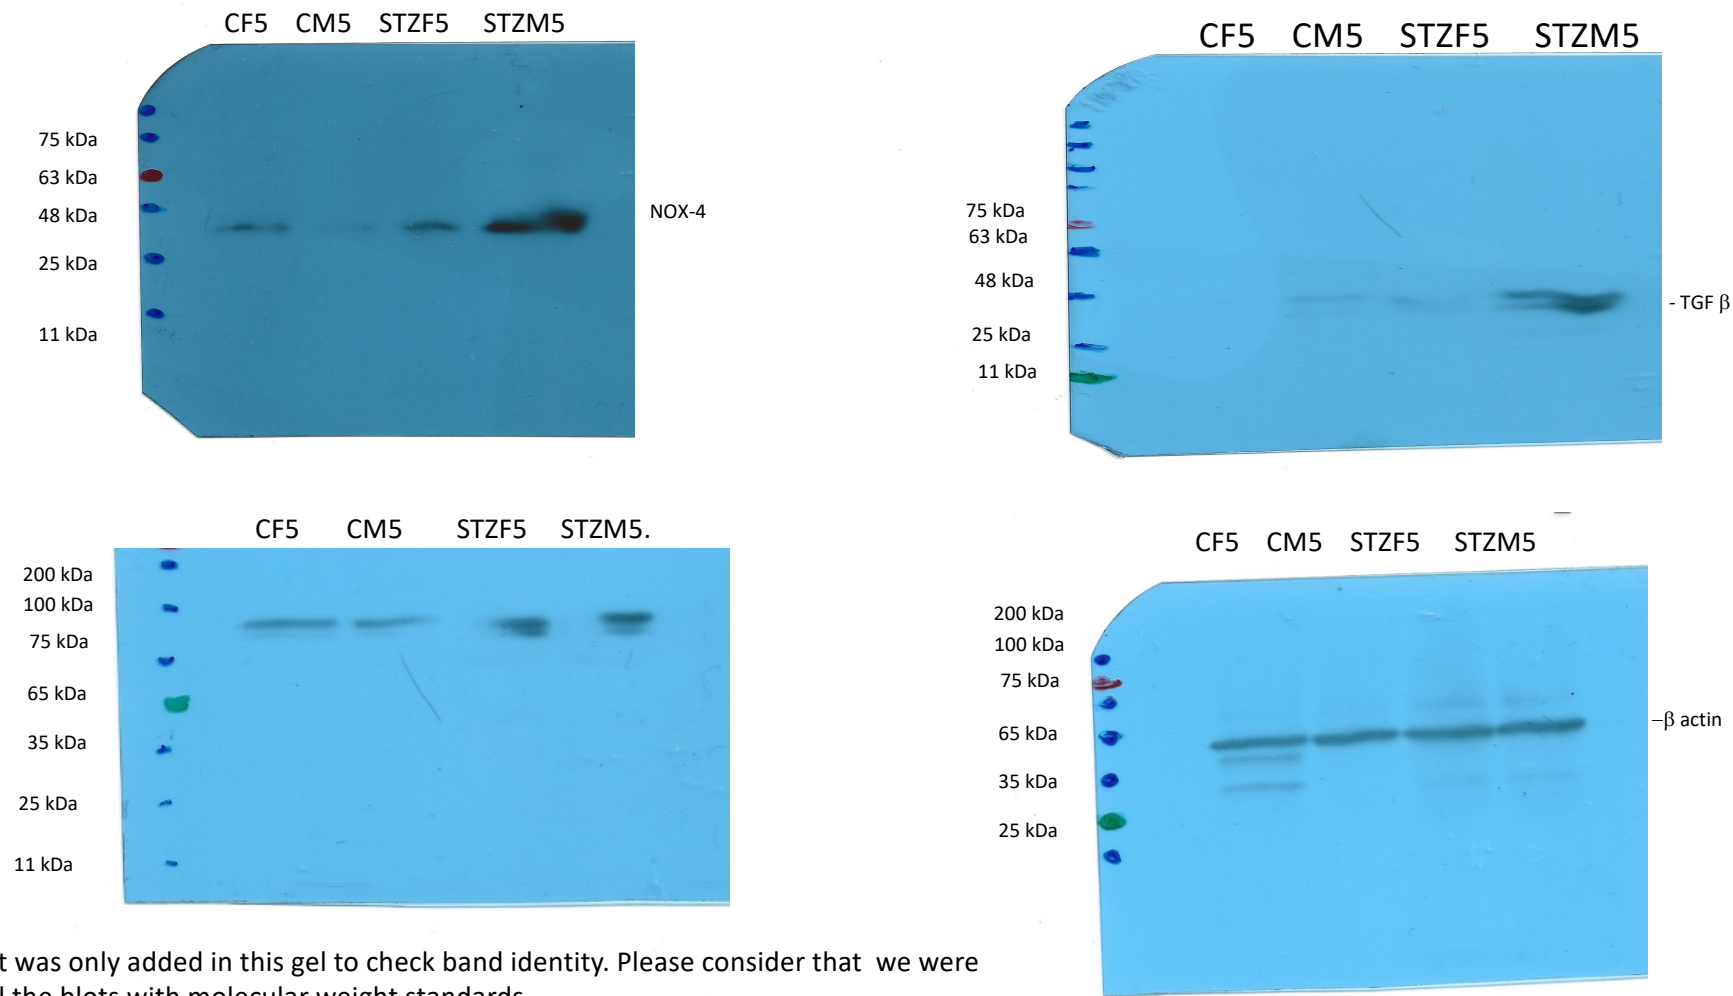

**Figure S3. IMCD cells from male and female showed same profile of expression in response to normal or high glucose**

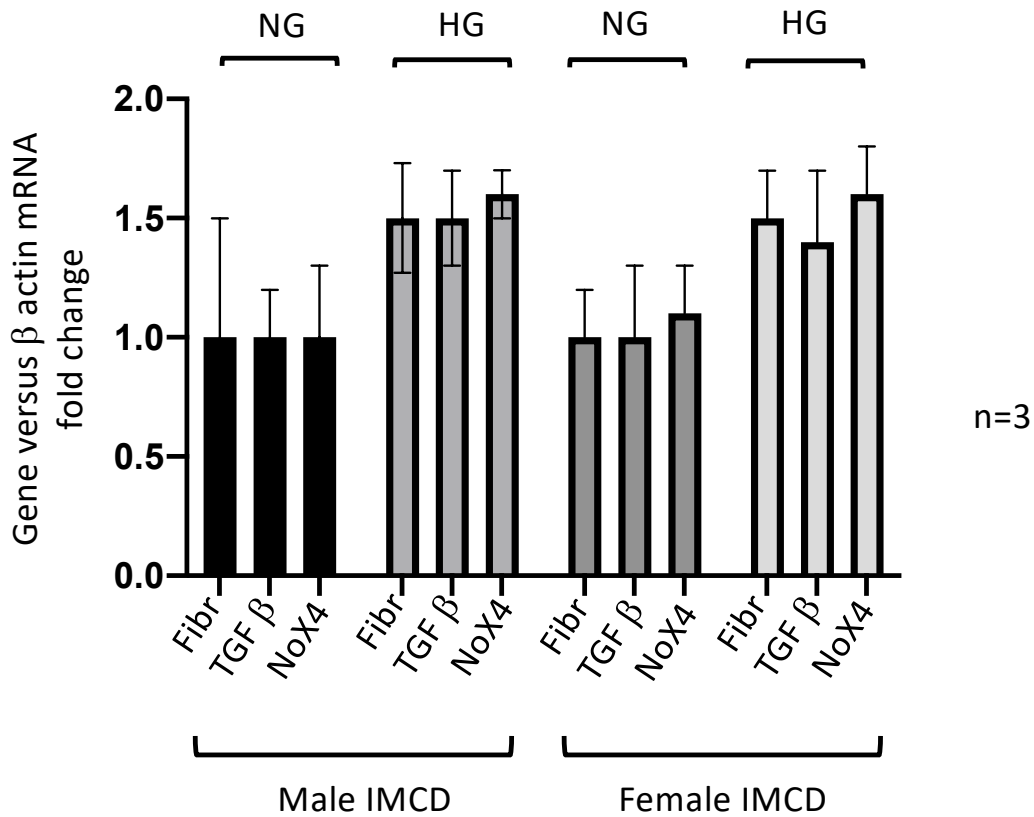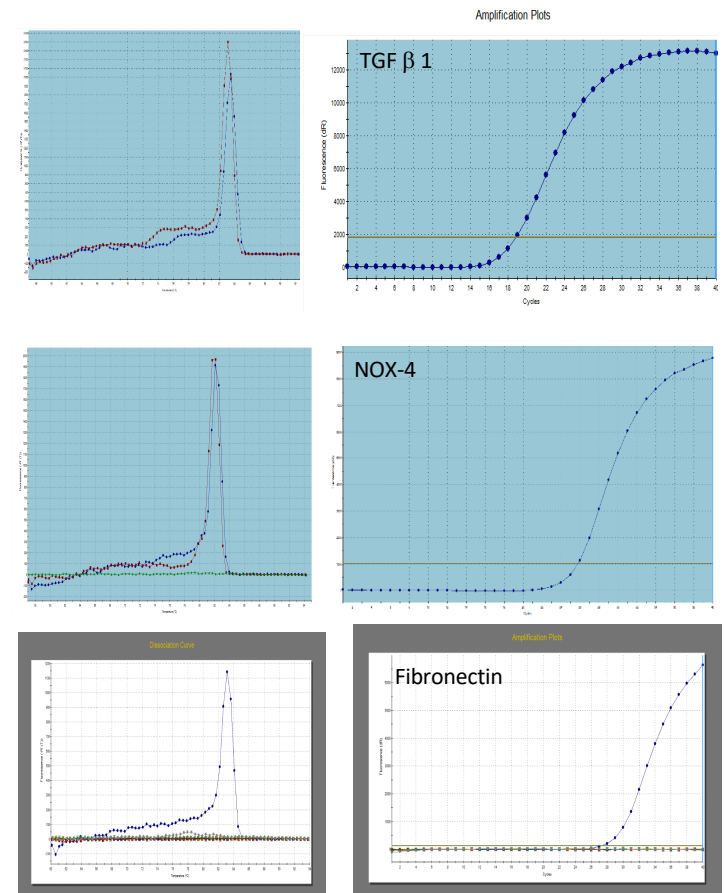

Cultured IMCD from male or female showed similar pattern of expression.

**Figure S4 Gel identity and molecular weight for the representative blot shown in Figure 6 B (NG1 vs HG1)**

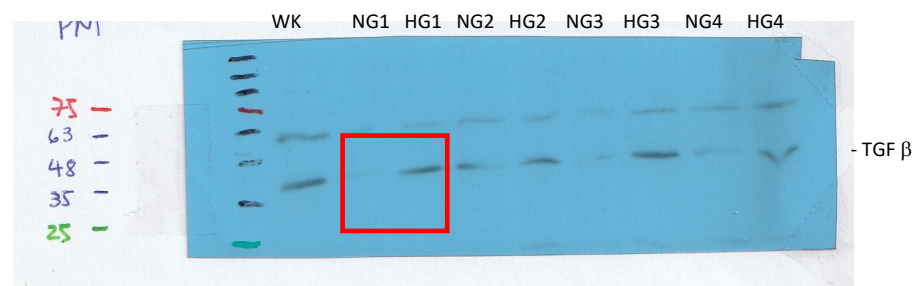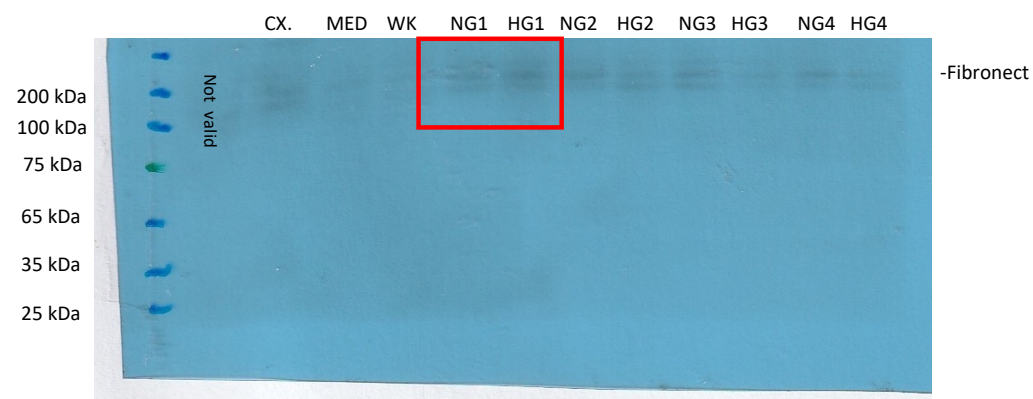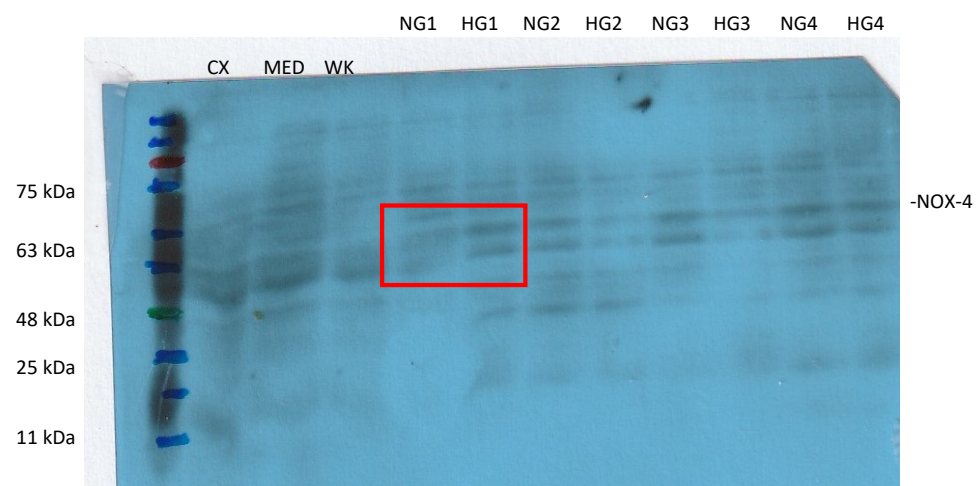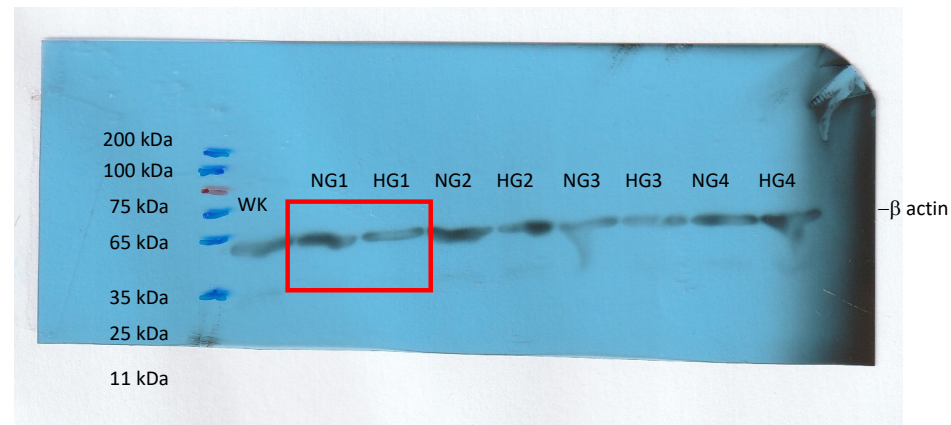

CX: cortex; MED: medulla; WK: whole kidney  
 n=4, IMCD cells incubated with NG= normo-glucose (5mM), HG= high-glucose (25 mM)

**Figure S5. Control for osmolality was evaluated by using 25 mM of mannitol. Results showed no differences on the expression of profibrotic genes analysed.**

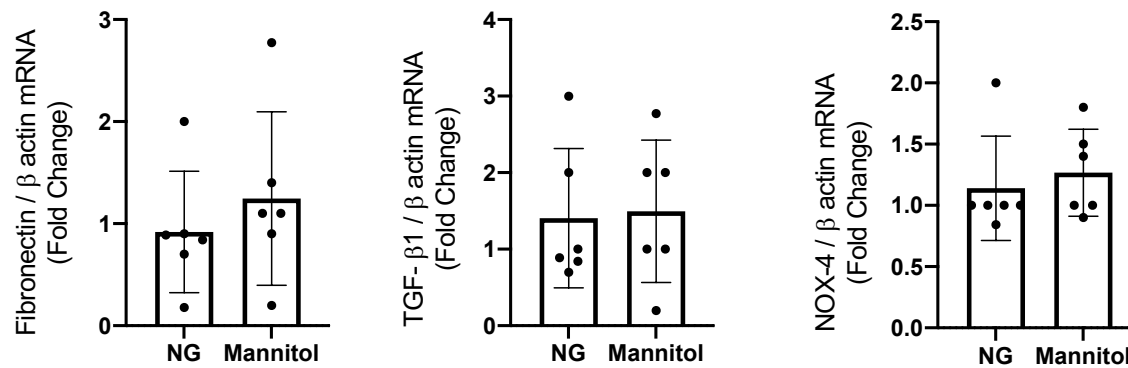

The possible effect of osmolar stress by adding glucose to IMCD cells by replacing by mannitol (25 mM) on the expression of profibrotic genes analyzed. No changes were seen, n=6.
